# Supplementary material
Source: PubMed Central journal article supplement (PMC4524538)
Supplement: NIHMS506603-supplement-01.pdf [file NIHMS506603-supplement-01.pdf]

## Supplementary Material I

To demonstrate the variability in  $Ratio_{BFI}$  among rats, we listed the individual  $Ratio_{BFI}$  values at each time point for two rat ischemic models in the following tables (see Tables S1 to S3). We found approximate 11% of variations among rats in both suture-induced and embolism-induced models without treatment (insert Supplementary Table S1). For embolism-induced model with treatment, we also found around 11% of standard deviation before treatment (insert Supplementary Table S2) but an increase in variation up to 18% for rtPA-mediated recanalization (insert Supplementary Table S3). Possible reason could be due to differences among animals. Increasing the number of experiment rats may help reduce the variations.
