# Supplementary material
Source: PubMed Central journal article supplement (PMC4524538)
Supplement: NIHMS506603-supplement-02.pdf [file NIHMS506603-supplement-02.pdf]

**Table S1**  $Ratio_{BFI}$  (%) for suture-induced ischemic model

|             | Time (min) |      |      |      |      |       |       |      |       |
|-------------|------------|------|------|------|------|-------|-------|------|-------|
|             | 30         | 40   | 50   | 70*  | 80*  | 90*   | 100*  | 110* | 120*  |
| <b>Rat1</b> | 8.5        | 9.2  | 9.8  | 67.8 | 64.4 | 71.8  | 70.6  | 66.3 | 69.8  |
| <b>Rat2</b> | 23.5       | 22.5 | 24.1 | 80.5 | 78.2 | 81.3  | 79.7  | 81.6 | 78.4  |
| <b>Rat3</b> | 31.2       | 29.7 | 32.2 | 96.5 | 97.7 | 100.7 | 102.4 | 96.5 | 101.1 |
| <b>Rat4</b> | 6.7        | 5.7  | 6.0  | 78.6 | 73.1 | 82.5  | 80.2  | 79.3 | 82.6  |
| <b>Rat5</b> | 4.7        | 6.6  | 5.9  | 61.1 | 63.4 | 65.9  | 62.6  | 68.4 | 65.4  |
| <b>Rat6</b> | 10.3       | 8.2  | 11.5 | 79.1 | 70.2 | 80.5  | 77.1  | 84.3 | 77.7  |
| <b>Mean</b> | 14.2       | 13.7 | 14.9 | 77.3 | 74.5 | 80.5  | 78.8  | 79.4 | 79.2  |
| <b>SD</b>   | 10.7       | 10.0 | 10.8 | 12.1 | 12.6 | 11.8  | 13.4  | 11.1 | 12.5  |

\*After suture withdrawal

**Table S2**  $Ratio_{BFI}(\%)$  for embolism-induced ischemic model – Control (untreated) group

|             | Time (mins) |      |      |      |      |      |      |      |      |
|-------------|-------------|------|------|------|------|------|------|------|------|
|             | 30          | 40   | 50   | 100* | 110* | 120* | 130* | 140* | 150* |
| <b>Rat1</b> | 50.1        | 47.6 | 49.8 | 51.3 | 50.2 | 47.9 | 45.2 | 44.1 | 40.6 |
| <b>Rat2</b> | 23.1        | 22.5 | 21.7 | 25.4 | 26.5 | 23.7 | 27.2 | 24.3 | 25.1 |
| <b>Rat3</b> | 32.6        | 29.7 | 28.6 | 37.2 | 34.9 | 32.1 | 29.4 | 29.8 | 26.4 |
| <b>Rat4</b> | 55.4        | 52.1 | 50.4 | 56.8 | 58.4 | 49.4 | 48.6 | 50.9 | 51.5 |
| <b>Rat5</b> | 47.6        | 43.2 | 41.7 | 42.1 | 47.6 | 48.6 | 44.3 | 45.4 | 42.1 |
| <b>Rat6</b> | 38.2        | 37.6 | 34.5 | 36.5 | 40.6 | 40.3 | 37.6 | 39.4 | 32.9 |
| <b>Mean</b> | 41.2        | 38.8 | 37.8 | 41.6 | 43.0 | 40.3 | 38.7 | 39.0 | 36.4 |
| <b>SD</b>   | 12.1        | 11.2 | 11.6 | 11.3 | 11.4 | 10.5 | 8.8  | 10.1 | 10.2 |

\*After saline infusion

**Table S3**  $Ratio_{BFI}$  (%) for embolism-induced ischemic model – rtPA treated group

|             | Time (mins) |      |      |      |      |      |       |       |       |
|-------------|-------------|------|------|------|------|------|-------|-------|-------|
|             | 30          | 40   | 50   | 100* | 110* | 120* | 130*  | 140*  | 150*  |
| <b>Rat1</b> | 54.1        | 52.7 | 50.5 | 81.1 | 88.8 | 99.2 | 102.5 | 105.9 | 104.4 |
| <b>Rat2</b> | 35.4        | 33.6 | 36.3 | 37.7 | 52.4 | 71.3 | 66.7  | 78.2  | 75.7  |
| <b>Rat3</b> | 17.6        | 18.8 | 21.4 | 44.4 | 43.1 | 52.1 | 50.2  | 66.3  | 60.1  |
| <b>Rat4</b> | 35.4        | 33.7 | 31.9 | 55.4 | 69.3 | 75.2 | 69.4  | 73.2  | 76.4  |
| <b>Rat5</b> | 29.4        | 30.3 | 27.5 | 79.7 | 86.5 | 99.8 | 90.5  | 100.5 | 102.8 |
| <b>Rat6</b> | 31.6        | 29.6 | 28.2 | 58.2 | 66.6 | 70.3 | 71.8  | 68.1  | 72.2  |
| <b>Mean</b> | 33.9        | 33.1 | 32.6 | 59.4 | 67.8 | 78.0 | 75.2  | 82.0  | 81.9  |
| <b>SD</b>   | 11.9        | 11.0 | 10.1 | 17.9 | 18.1 | 18.5 | 18.6  | 17.0  | 17.8  |

\*After rtPA infusion
