# Supplementary material
Source: PubMed Central journal article supplement (PMC4524538)

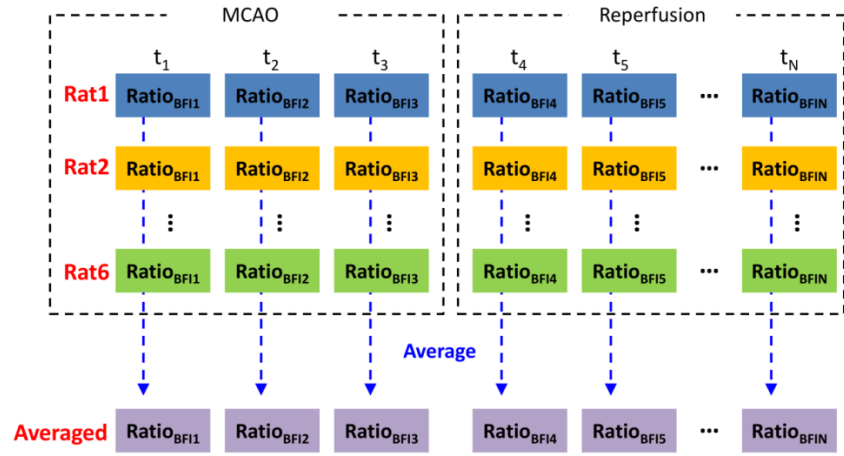

Figure S1

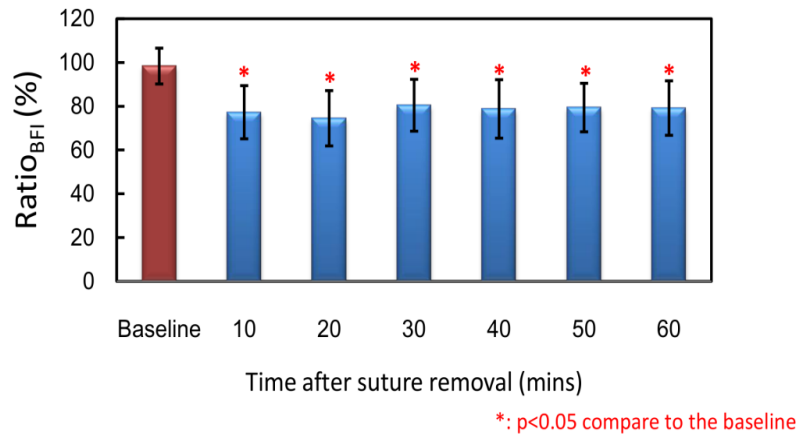

**Figure S2**

Supplement: NIHMS506603-supplement-03.pdf [file NIHMS506603-supplement-03.pdf]
